# Supplementary material for: Regional dynamical and statistical downscaling temperature, humidity and wind speed for the Beijing region under stratospheric aerosol injection geoengineering
Source: Copernicus journal article supplement (doi:10.5194/esd-13-1625-2022), 2022-11-18
Supplement: Supplementary file 1 [file esd-13-1625-2022-supplement.pdf]

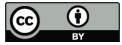

*Supplement of*

**Regional dynamical and statistical downscaling temperature, humidity and wind speed for the Beijing region under stratospheric aerosol injection geoengineering**

**Jun Wang et al.**

*Correspondence to:* Liyun Zhao (zhaoliyun@bnu.edu.cn) and John C. Moore (john.moore.bnu@gmail.com)

The copyright of individual parts of the supplement might differ from the article licence.

## Supplementary Information

**Table S1.** Monthly driving data fields from ESMs.

|                | Variable | Variable long name                                | Units              |
|----------------|----------|---------------------------------------------------|--------------------|
|                | hus      | Specific Humidity (%)                             | %                  |
|                | ta       | Air Temperature (K)                               | K                  |
| Pressure level | ua       | Eastward Wind (m/s)                               | m/s                |
|                | va       | Northward Wind (m/s)                              | m/s                |
|                | zg       | Geopotential Height (m)                           | m                  |
|                | huss     | Near-Surface Specific Humidity (%)                | %                  |
| Near surface   | tas      | Near-Surface Air Temperature (K)                  | K                  |
|                | uas      | Eastward Near-Surface Wind (m/s)                  | m/s                |
|                | vas      | Northward Near-Surface Wind (m/s)                 | m/s                |
| Surface        | ps       | Surface Air Pressure (Pa)                         | Pa                 |
|                | psl      | Sea Level Pressure (Pa)                           | Pa                 |
| Soil level     | mrlsl    | Water Content of Soil Layer (kg m <sup>-2</sup> ) | kg m <sup>-2</sup> |
|                | tsl      | Temperature of Soil (K)                           | K                  |
| Skin_temp      | ts       | Surface Temperature (K)                           | K                  |

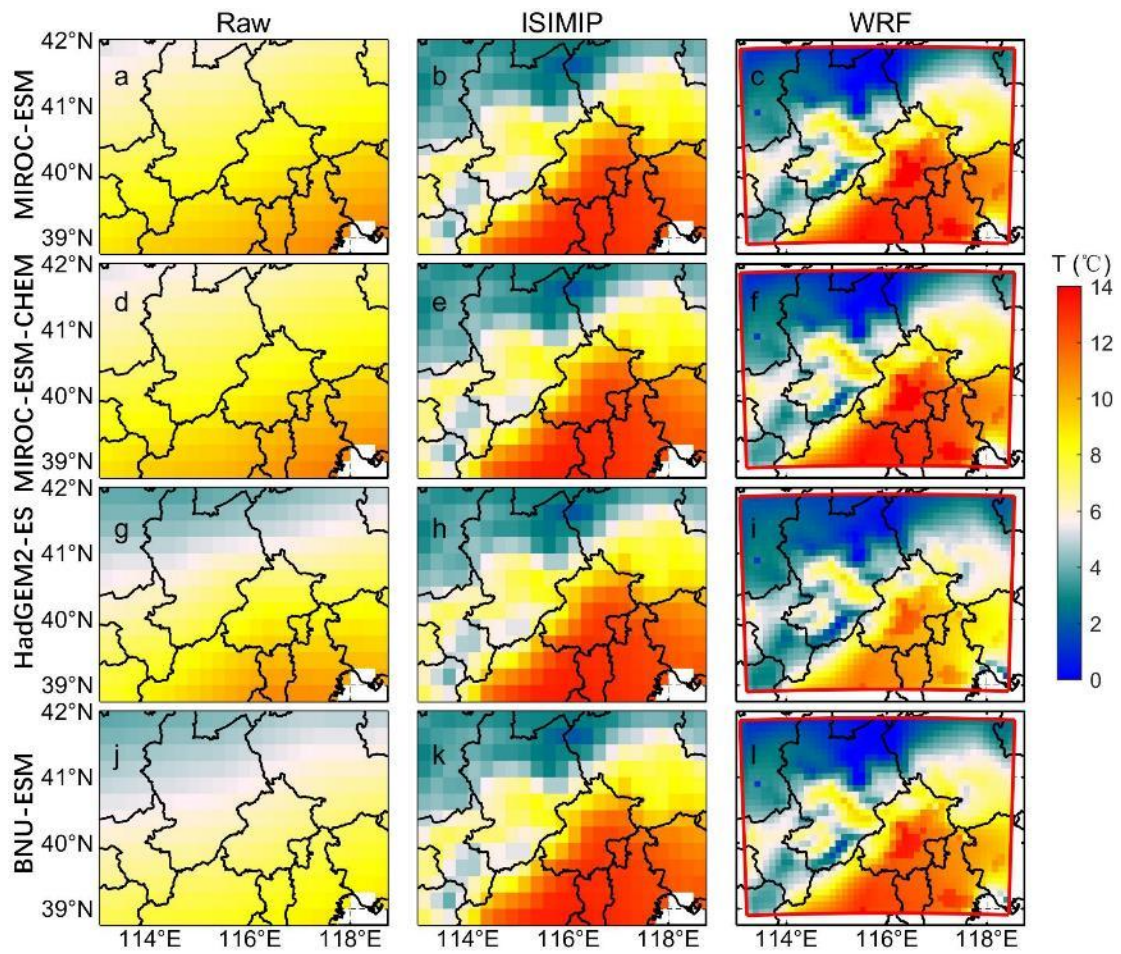

Figure S1: The mean 2m temperature of raw ESMs, ISIMIP bias correction and WRF downscaling by top to bottom rows: MIROC-ESM (a-c), MIROC-ESM-CHEM (d-f), HadGEM2-ES (g-i) and BNU-ESM (j-l) during 1980-1989. Raw ESMs results are interpolated into the same resolution as ERA5 using bilinear interpolation.

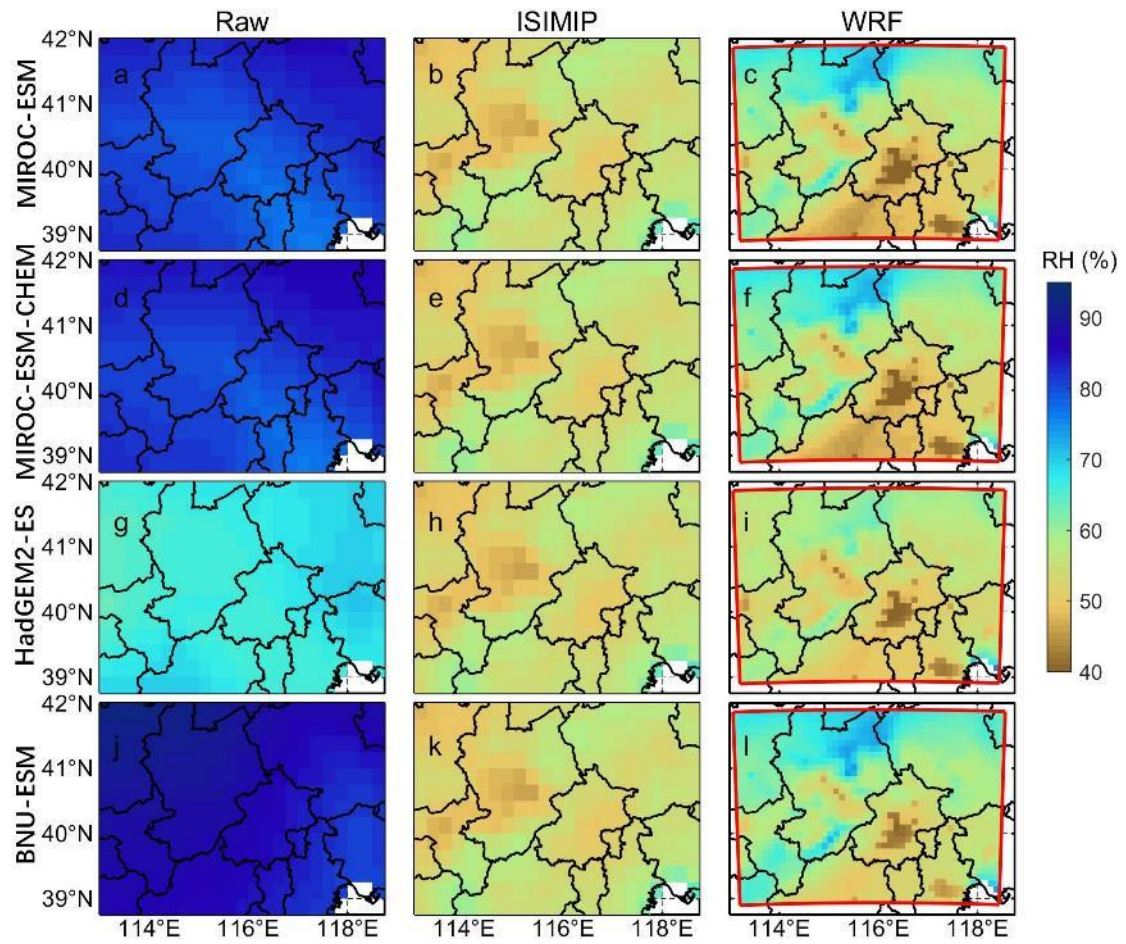

Figure S2: The mean relative humidity (%) of raw ESMs, ISIMIP bias correction and WRF downscaling by top to bottom rows: MIROC-ESM (a-c), MIROC-ESM-CHEM (d-f), HadGEM2-ES (g-i) and BNU-ESM (j-l) during 1980-1989. Raw ESMs results are interpolated into the same resolution as ERA5 using bilinear interpolation.



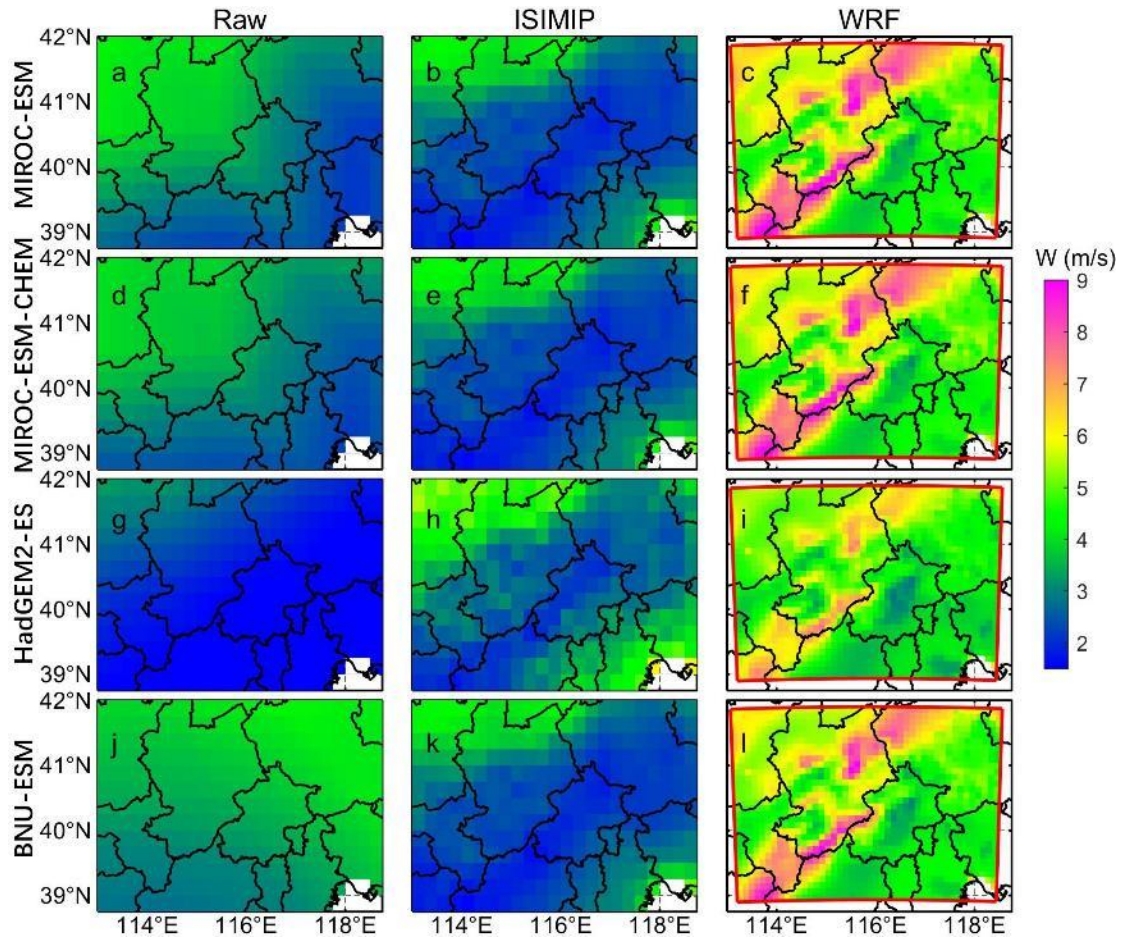

Figure S3: The mean wind speed (m/s) of raw ESMs, ISIMIP bias correction and WRF downscaling by top to bottom rows: MIROC-ESM (a-c), MIROC-ESM-CHEM (d-f), HadGEM2-ES (g-i) and BNU-ESM (j-l) during 1980-1989. Raw ESMs results are interpolated into the same resolution as ERA5 using bilinear interpolation.

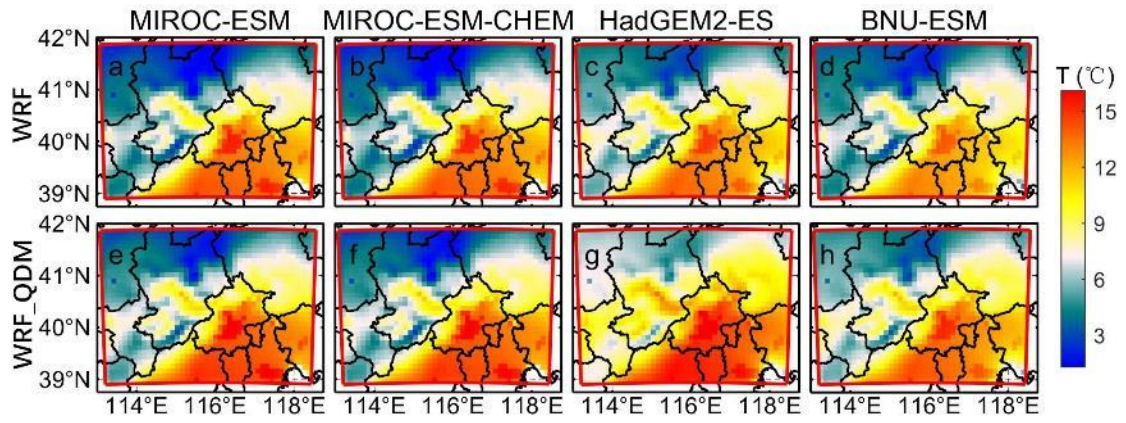

Figure S4: The mean 2m temperature from WRF raw results (a-d) and WRF after QDM bias correction results (e-h) during 2008-2017. Columns from left to right are MIROC-ESM (a, e), MIROC-ESM-CHEM (b, f), HadGEM2-ES (c, g) and BNU-ESM (d, h).

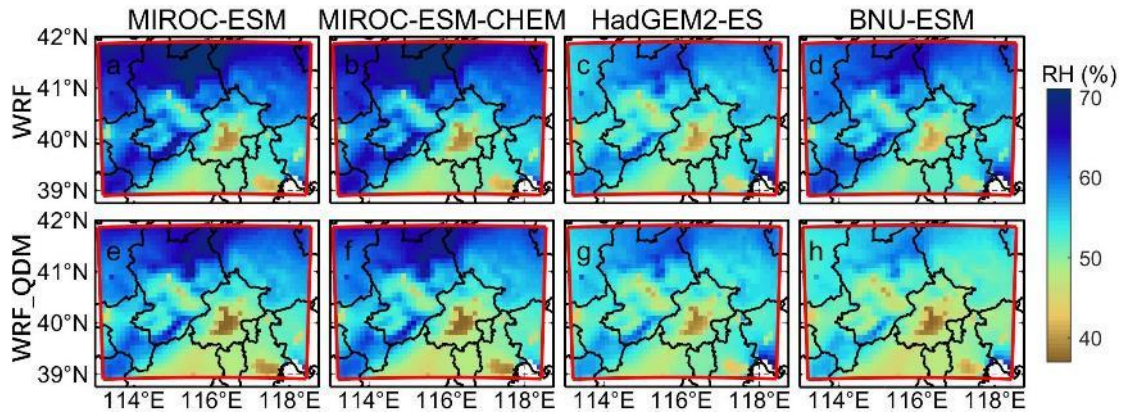

Figure S5: Same as figure S4 but for relative humidity (%).

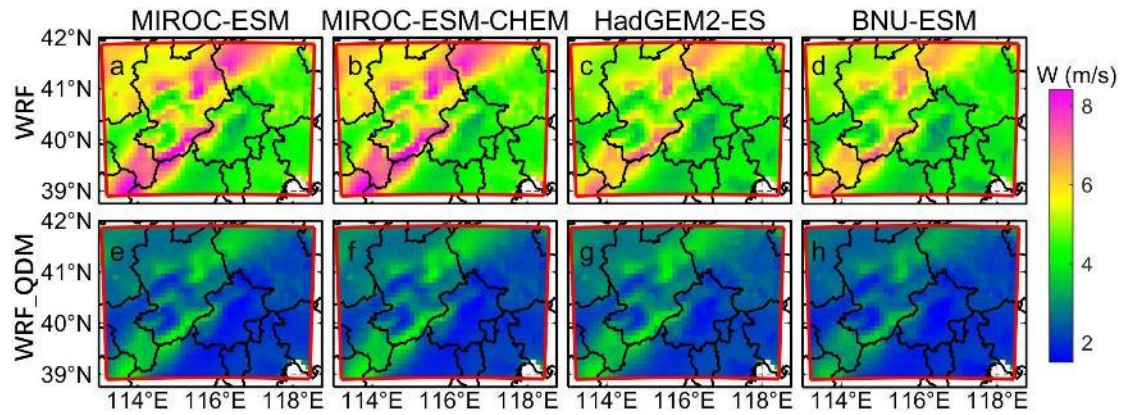

Figure S6: Same as figure S4 but for wind speed (m/s).



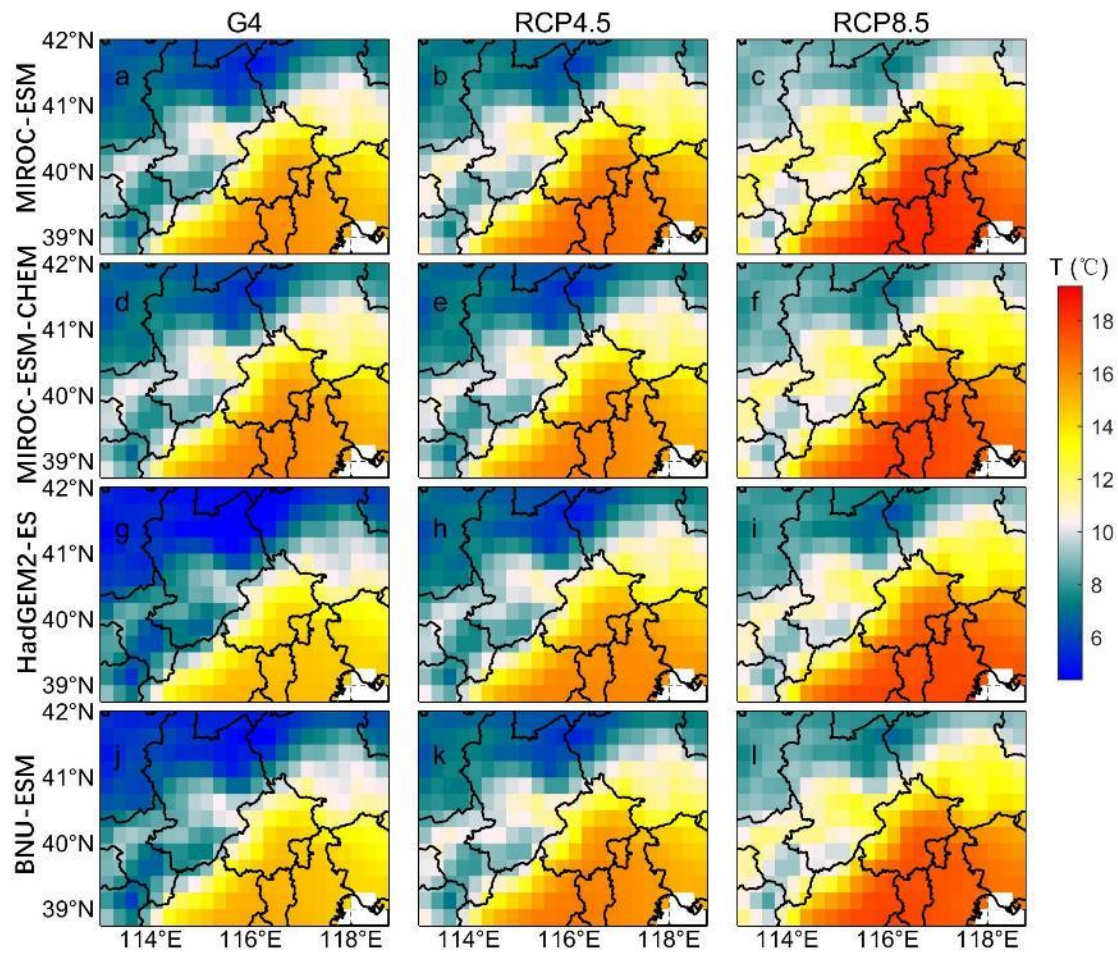

Figure S7: The mean 2m temperature of G4 (a, d, g, j), RCP4.5 (b, e, h, k) and RCP8.5 (c, f, i, l) from ISIMIP by top to bottom rows: MIROC-ESM (a-c), MIROC-ESM-CHEM (d-f), HadGEM2-ES (g-i) and BNU-ESM (j-l) during 2060-2069.

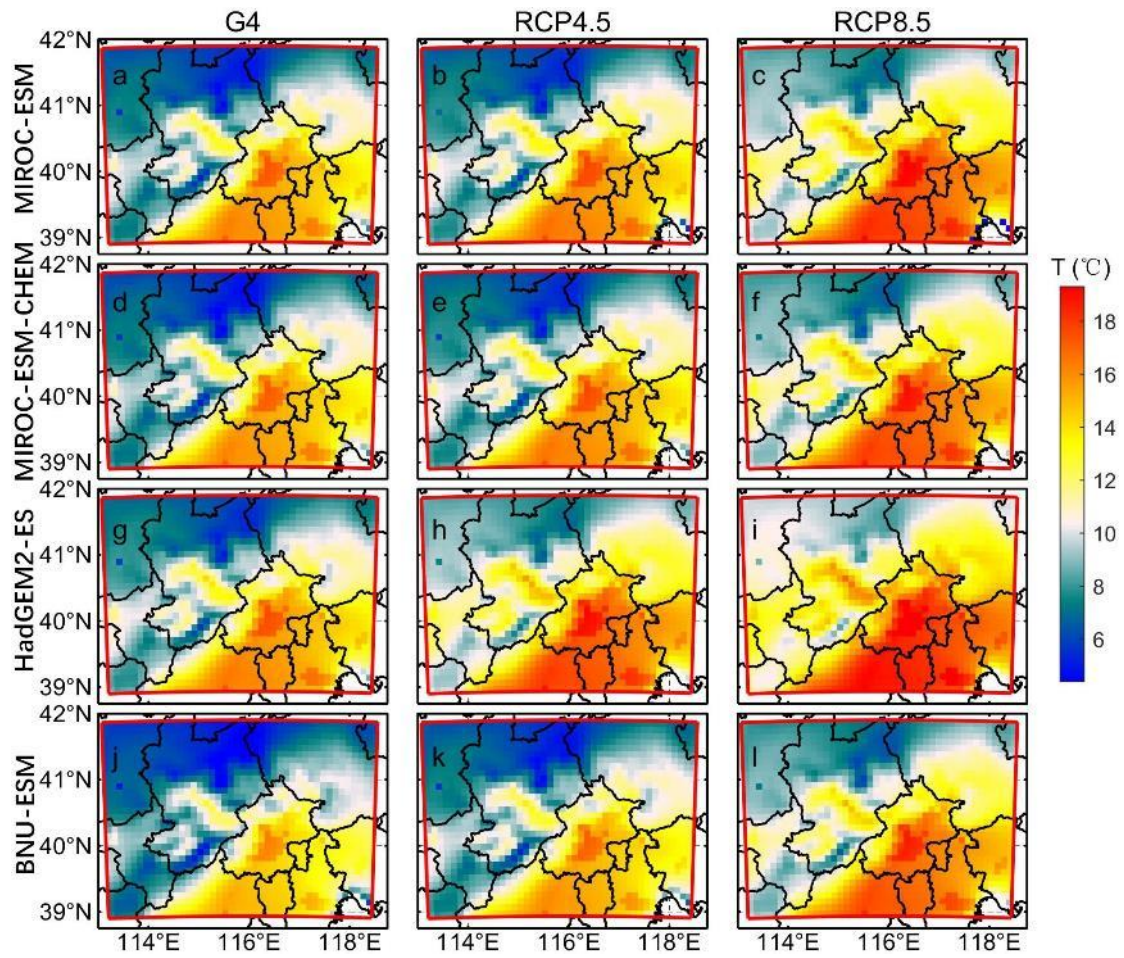

Figure S8: The mean 2m temperature of G4 (a, d, g, j), RCP4.5 (b, e, h, k) and RCP8.5 (c, f, i, l) from WRF\_QDM by top to bottom rows: MIROC-ESM (a-c), MIROC-ESM-CHEM (d-f), HadGEM2-ES (g-i) and BNU-ESM (j-l) during 2060-2069.



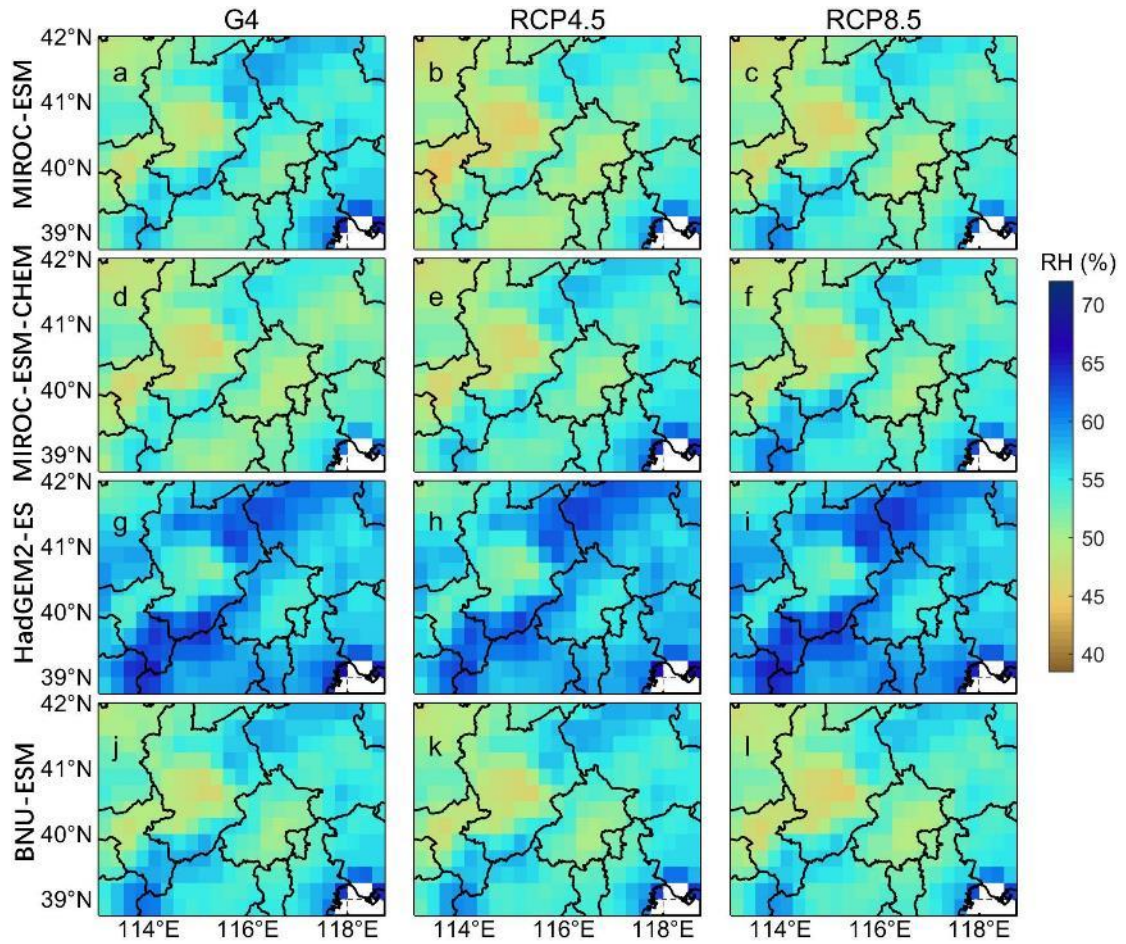

Figure S9: The relative humidity (%) of G4 (a, d, g, j), RCP4.5 (b, e, h, k) and RCP8.5 (c, f, i, l) from ISIMIP by top to bottom rows: MIROC-ESM (a-c), MIROC-ESM-CHEM (d-f), HadGEM2-ES (g-i) and BNU-ESM (j-l) during 2060-2069.

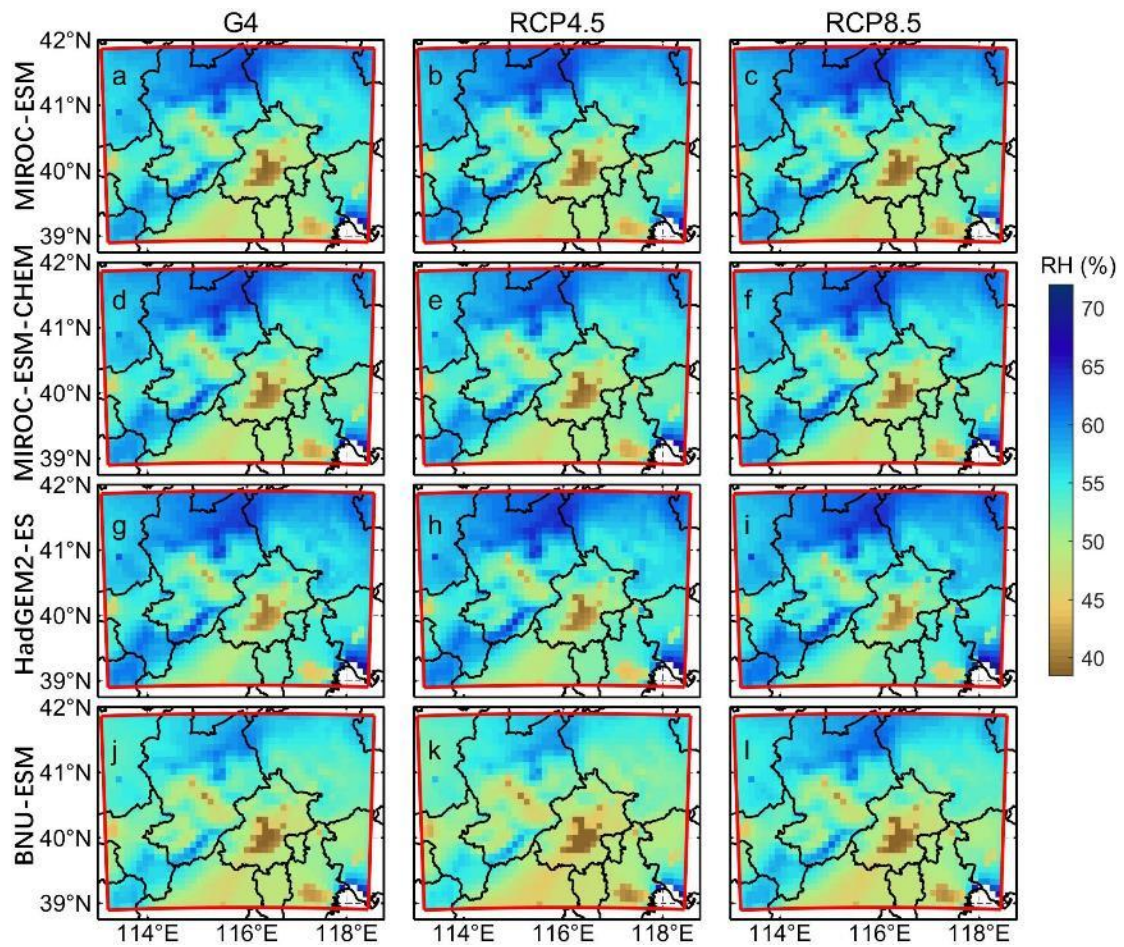

Figure S10: The relative humidity (%) of G4 (a, d, g, j), RCP4.5 (b, e, h, k) and RCP8.5 (c, f, i, l) from WRF\_QDM by top to bottom rows: MIROC-ESM (a-c), MIROC-ESM-CHEM (d-f), HadGEM2-ES (g-i) and BNU-ESM (j-l) during 2060-2069.



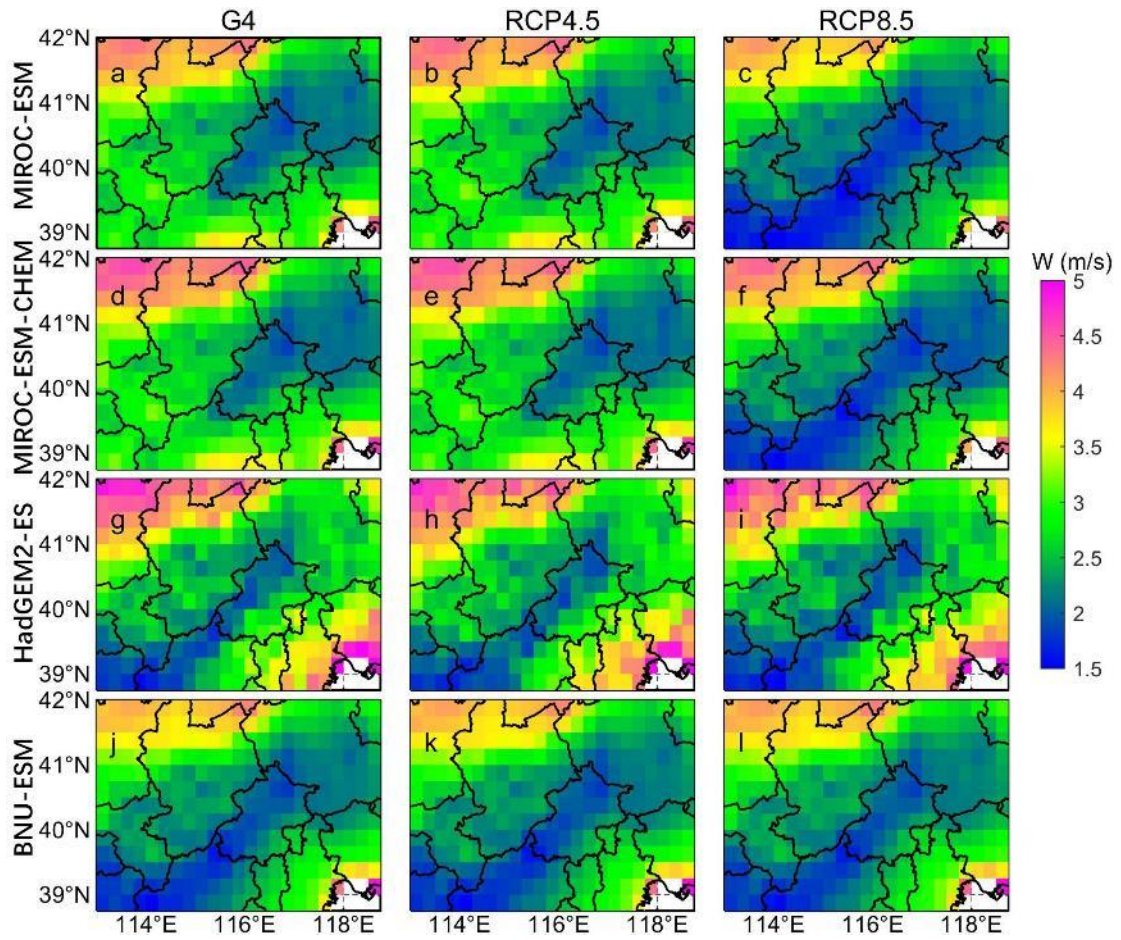

Figure S11: The mean wind speed (m/s) G4 (a, d, g, j), RCP4.5 (b, e, h, k) and RCP8.5 (c, f, i, l) from ISIMIP by top to bottom rows: MIROC-ESM (a-c), MIROC-ESM-CHEM (d-f), HadGEM2-ES (g-i) and BNU-ESM (j-l) during 2060-2069.



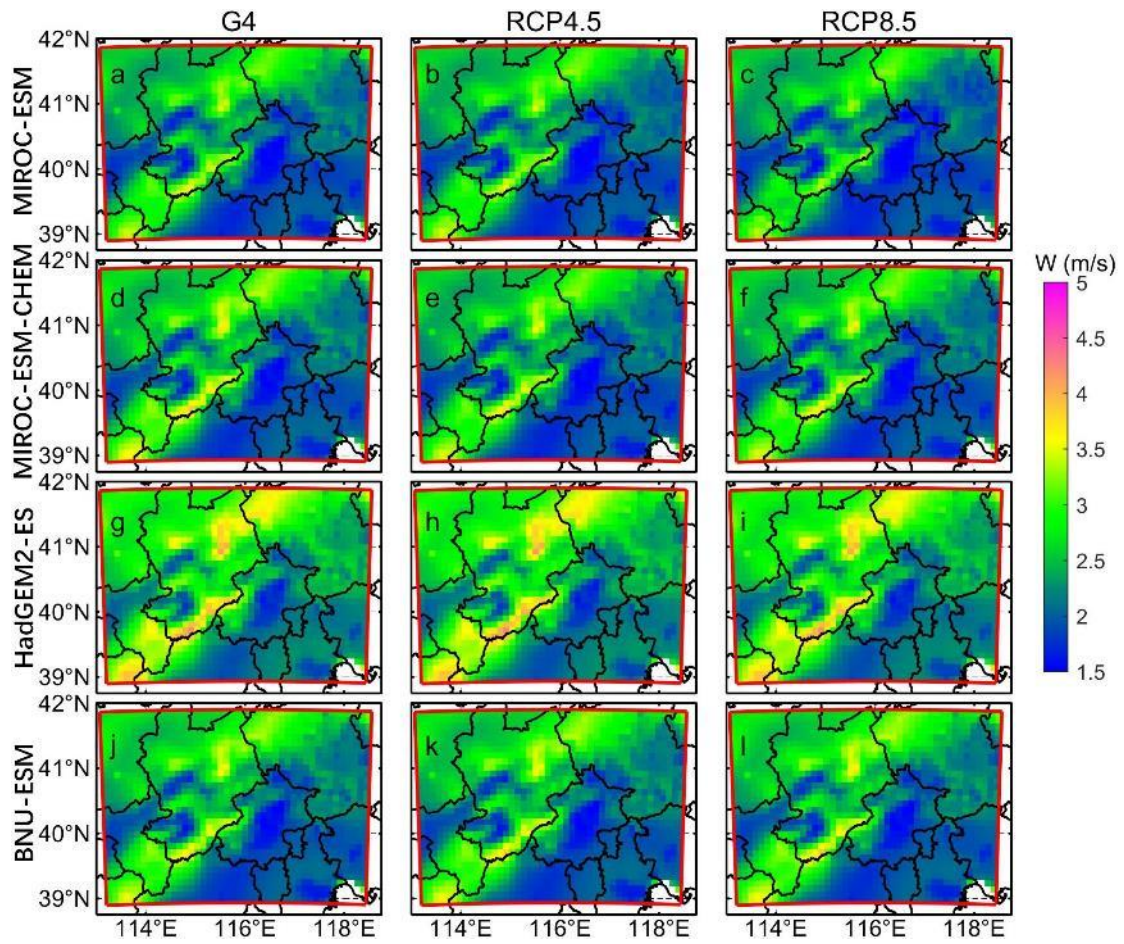

Figure S12: The mean wind speed (m/s) of G4 (a, d, g, j), RCP4.5 (b, e, h, k) and RCP8.5 (c, f, i, l) from WRF\_QDM by top to bottom rows: MIROC-ESM (a-c), MIROC-ESM-CHEM (d-f), HadGEM2-ES (g-i) and BNU-ESM (j-l) during 2060-2069.

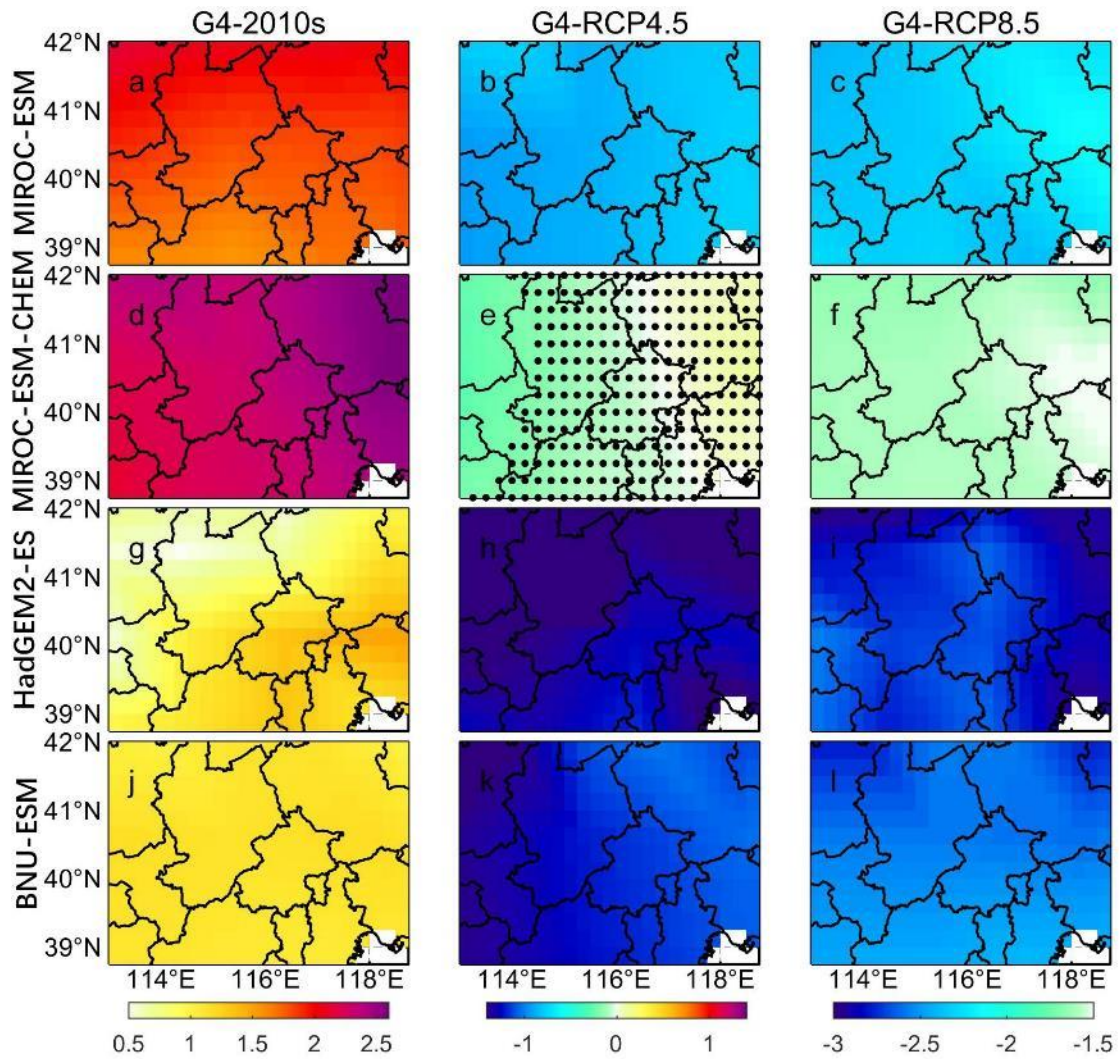

Figure S13: Spatial pattern of 2m temperature difference (°C) under different scenarios over 2060-2069: G4-2010s (left column), G4-RCP4.5 (second column) and G4-RCP8.5 (right column) based on ISIMIP method. 2010s means the results simulated during 2008-2017. From top to bottom are MIROC-ESM (a-c), MIROC-ESM-CHEM (d-f), HadGEM2-ES (g-i) and BNU-ESM (j-l), respectively. Stippling indicates grid points where differences or changes are not significant at the 5% level according to the Wilcoxon signed rank test.



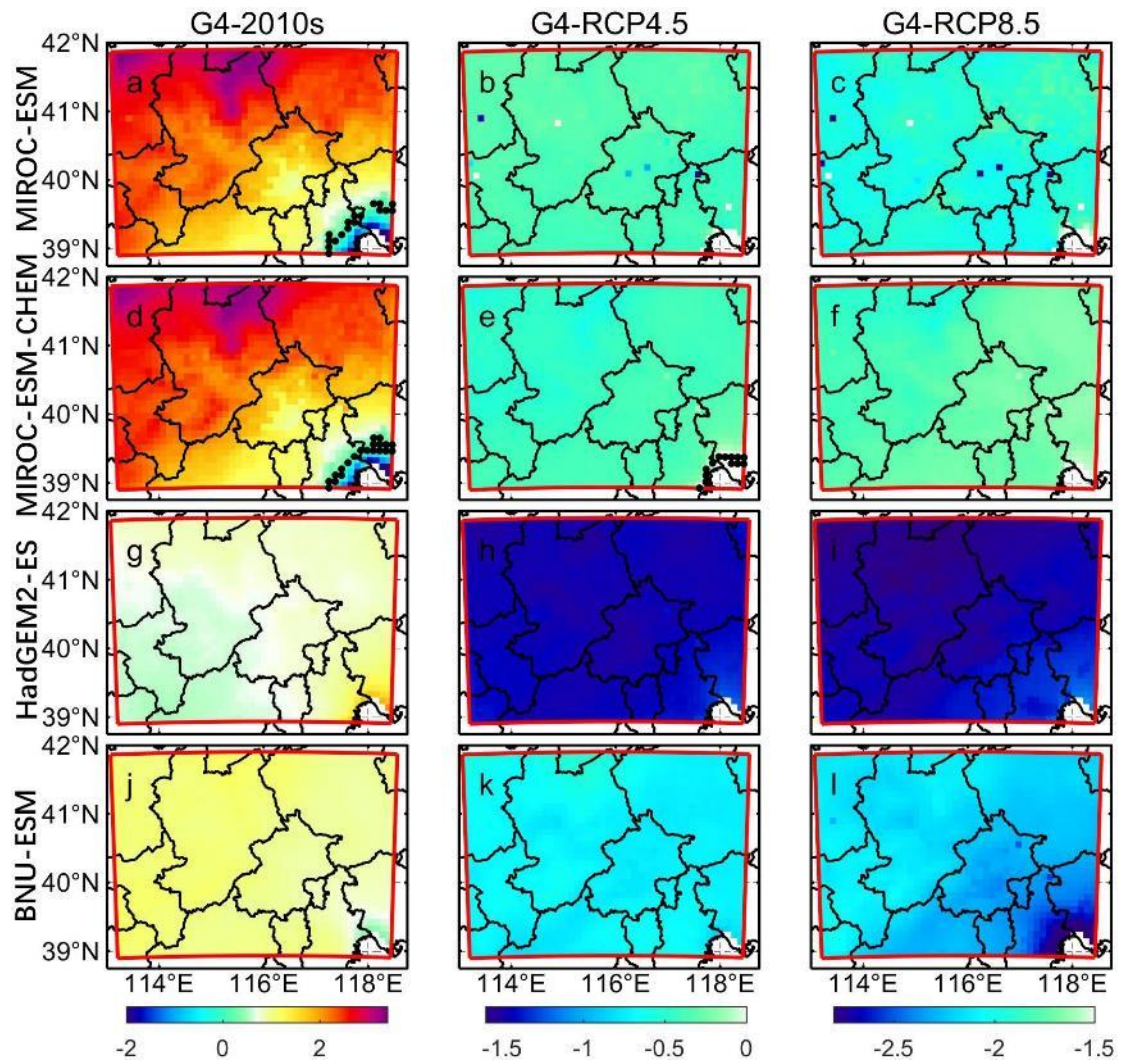

Figure S14: Spatial pattern of 2m temperature difference ( $^{\circ}\text{C}$ ) under different scenarios over 2060-2069: G4-2010s (left column), G4-RCP4.5 (second column) and G4-RCP8.5 (right column) based on WRF\_QDM results. 2010s means the results simulated during 2008-2017. From top to bottom are MIROC-ESM (a-c), MIROC-ESM-CHEM (d-f), HadGEM2-ES (g-i) and BNU-ESM (j-l), respectively. Stippling indicates grid points where differences or changes are not significant at the 5% level according to the Wilcoxon signed rank test.



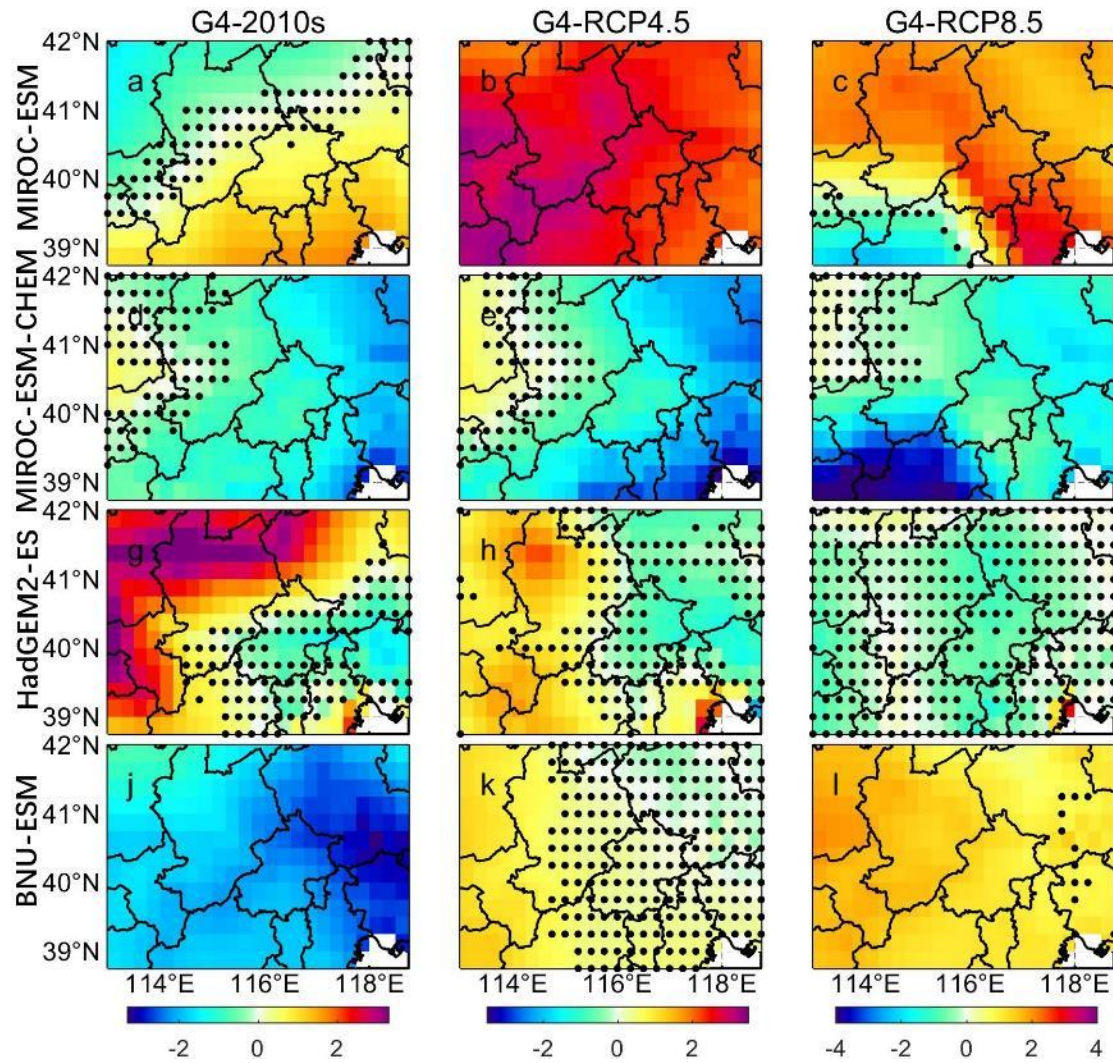

Figure S15: Spatial pattern of relative humidity (%) difference under different scenarios over 2060-2069: G4-2010s (left column), G4-RCP4.5 (second column) and G4-RCP8.5 (right column) based on ISIMIP method. 2010s means the results simulated during 2008-2017. From top to bottom are MIROC-ESM (a-c), MIROC-ESM-CHEM (d-f), HadGEM2-ES (g-i) and BNU-ESM (j-l), respectively. Stippling indicates grid points where differences or changes are not significant at the 5% level according to the Wilcoxon signed rank test.

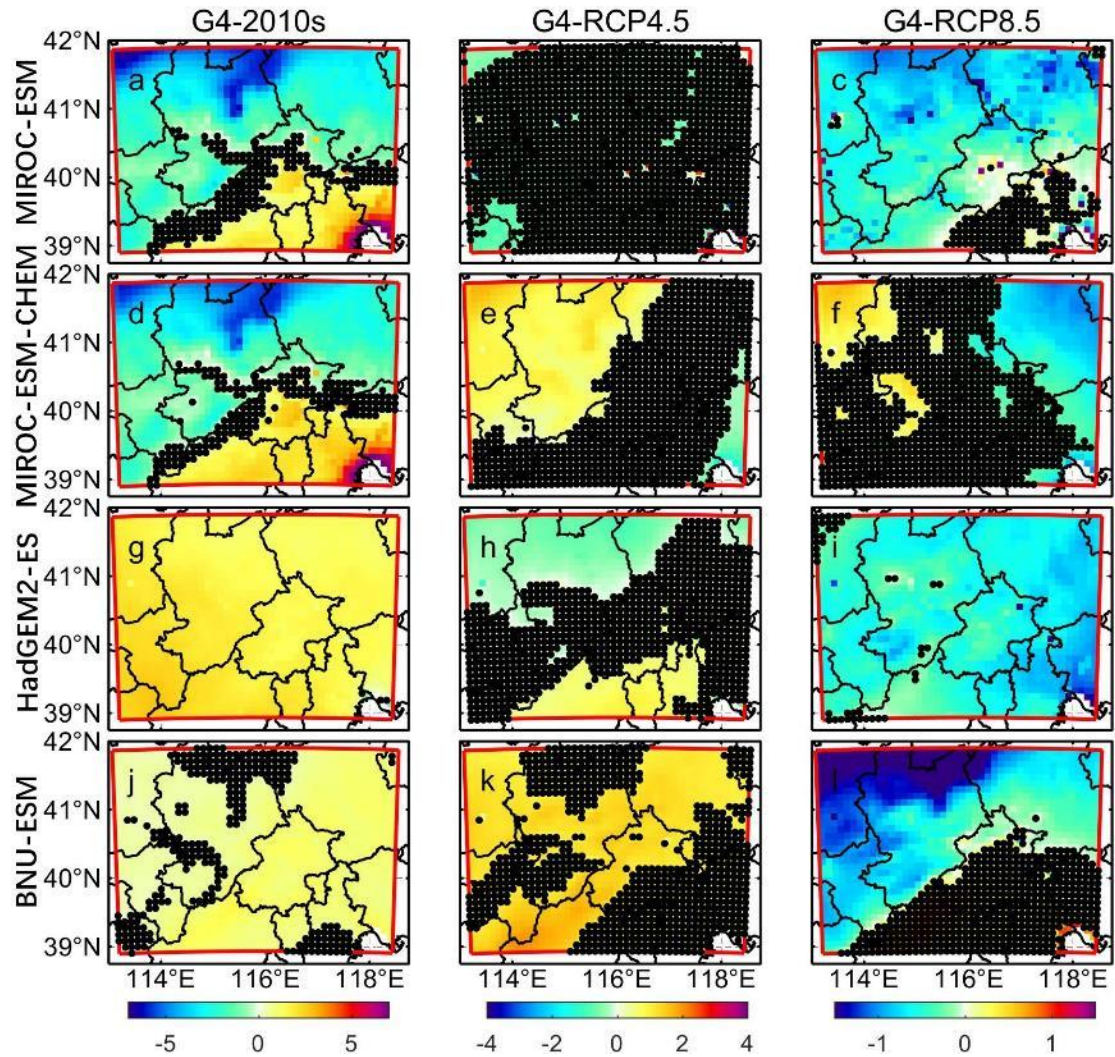

Figure S16: Spatial pattern of relative humidity difference (%) under different scenarios over 2060-2069: G4-2010s (left column), G4-RCP4.5 (second column) and G4-RCP8.5 (right column) based on WRF\_QDM results. 2010s means the results simulated during 2008-2017. From top to bottom are MIROC-ESM (a-c), MIROC-ESM-CHEM (d-f), HadGEM2-ES (g-i) and BNU-ESM (j-l), respectively. Stippling indicates grid points where differences or changes are not significant at the 5% level according to the Wilcoxon signed rank test.



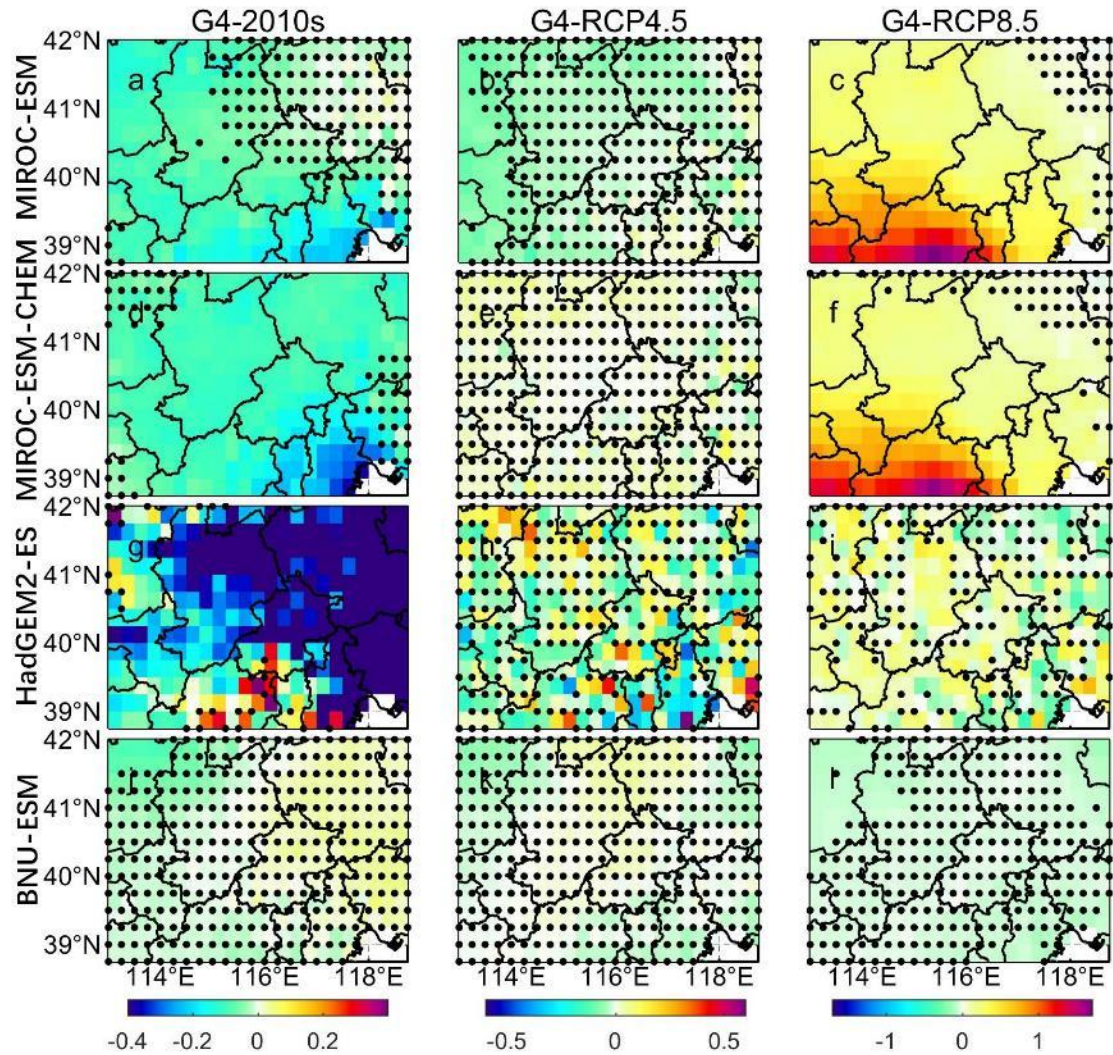

Figure S17: Spatial pattern of wind speed (m/s) difference under different scenarios over 2060-2069: G4-2010s (left column), G4-RCP4.5 (second column) and G4-RCP8.5 (right column) based on ISIMIP method. 2010s means the results simulated during 2008-2017. From top to bottom are MIROC-ESM (a-c), MIROC-ESM-CHEM (d-f), HadGEM2-ES (g-i) and BNU-ESM (j-l), respectively. Stippling indicates grid points where differences or changes are not significant at the 5% level according to the Wilcoxon signed rank test.



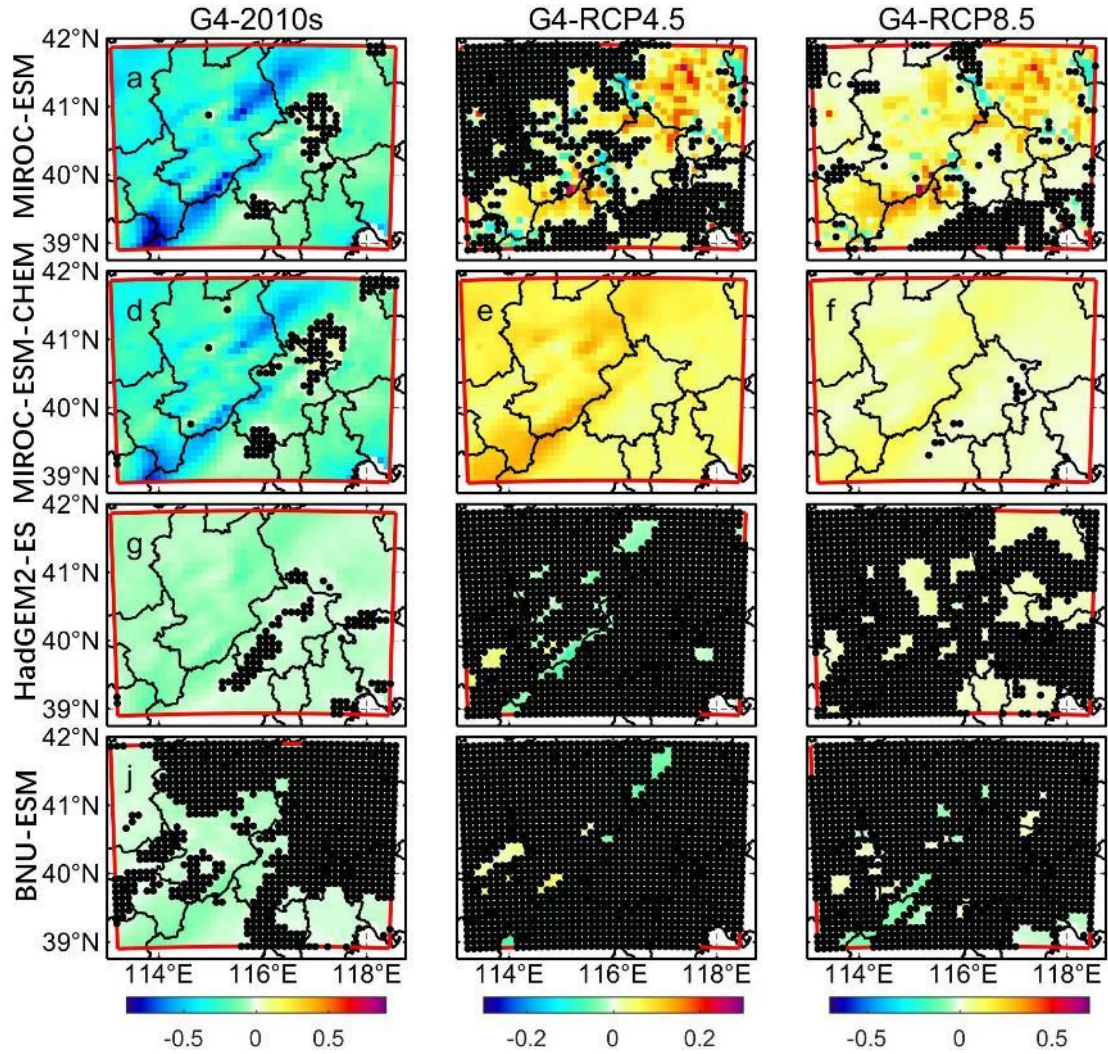

Figure S18: Spatial pattern of wind speed (m/s) difference under different scenarios over 2060-2069: G4-2010s (left column), G4-RCP4.5 (second column) and G4-RCP8.5 (right column) based on WRF\_QDM results. 2010s means the results simulated during 2008-2017. From top to bottom are MIROC-ESM (a-c), MIROC-ESM-CHEM (d-f), HadGEM2-ES (g-i) and BNU-ESM (j-l), respectively. Stippling indicates grid points where differences or changes are not significant at the 5% level according to the Wilcoxon signed rank test.
